# Supplementary material for: Chemical Composition and Anti-Candida Activity of Mentha suaveolens Ehrh. Essential Oils Obtained by Different Distillation Processes
Source: MDPI journal article supplement (doi:10.3390/molecules28196934), 2023-10-04
Supplement: s1 [file s1]

**Chemical Composition Investigation and Anti-*Candida* Activity of *Mentha suaveolens* Ehrh. Essential Oils Obtained by Continuous and Fractionated Hydrodistillation and Steam Distillation**

Vanja Tadić, Mijat Božović, Filippo Sapienza, Roberta Astolfi, Milan Mladenović, Maria Cristina Zaka, Fabiana Del Bove, Francesca Borzacchi, Caterina Fraschetti, Caterina Rossi, Silvia Vertuani, Anna Baldisserotto, Stefano Manfredini and Rino Ragno

**Supplementary Material**

---

**Tables:**

**Table S1.** Share % of total (up to 24h) yields for each continued extraction.

|                | 1 <sup>st</sup> harvest |                    |                    |                    | 2 <sup>nd</sup> harvest |         |         |         |
|----------------|-------------------------|--------------------|--------------------|--------------------|-------------------------|---------|---------|---------|
| h <sup>1</sup> | fc-SD <sup>2</sup>      | dc-SD <sup>3</sup> | fc-HD <sup>4</sup> | dc-HD <sup>5</sup> | fc-SD                   | dc-SD   | fc-HD   | dc-HD   |
| 1              | 26.4915                 | 38.628             | 14.6985            | 34.333             | 15.5085                 | 36.961  | 27.7723 | 43.906  |
| 2              | 26.4466                 | 35.825             | 29.6103            | 42.139             | 43.3441                 | 37.117  | 25.2706 | 42.188  |
| 3              | 41.5148                 | 28.537             | 14.4229            | 44.585             | 41.8964                 | 26.584  | 31.4445 | 47.133  |
| 6              | 33.3333                 | 46.283             | 18.5218            | 46.597             | 49.3941                 | 41.656  | 35.5808 | 48.391  |
| 24             | 100.000                 | 100.000            | 100.000            | 100.000            | 100.000                 | 100.000 | 100.000 | 100.000 |

<sup>1</sup> extraction duration; <sup>2</sup> fc-SD = continuous steam distillation on fresh plant; <sup>3</sup> dc-SD = continuous steam distillation on dried plant; <sup>4</sup> fc-HD = continuous hydrodistillation on fresh plant; <sup>5</sup> dc-HD = continuous hydrodistillation on dried plant.

**Table S2.** Share % of total yields over extraction time for the fractionated SDs and HDs on the fresh and dried plant.

|                | 1 <sup>st</sup> harvest |                    |                    |                    | 2 <sup>nd</sup> harvest |         |         |         |
|----------------|-------------------------|--------------------|--------------------|--------------------|-------------------------|---------|---------|---------|
| h <sup>1</sup> | ff-SD <sup>2</sup>      | df-SD <sup>3</sup> | ff-HD <sup>4</sup> | df-HD <sup>5</sup> | ff-SD                   | df-SD   | ff-HD   | df-HD   |
| 0-1            | 15.6915                 | 61.4409            | 52.4297            | 83.3489            | 21.4115                 | 35.4934 | 43.1048 | 55.5271 |
| 0-2            | 40.8344                 | 69.8663            | 73.6670            | 88.8827            | 45.9733                 | 43.4064 | 63.8588 | 71.8449 |
| 0-3            | 55.8557                 | 71.9192            | 83.3616            | 91.9925            | 59.1020                 | 52.8609 | 75.1298 | 76.5939 |
| 0-6            | 86.0368                 | 83.6293            | 98.7700            | 94.3486            | 80.2329                 | 68.1115 | 85.2230 | 89.5976 |
| 0-24           | 100.000                 | 100.000            | 100.000            | 100.000            | 100.000                 | 100.000 | 100.000 | 100.000 |

<sup>1</sup> extraction hour/interval; <sup>2</sup> ff-SD = fractionated steam distillation on fresh plant; <sup>3</sup> df-SD = fractionated steam distillation on dried plant; <sup>4</sup> ff-HD = fractionated hydrodistillation on fresh plant; <sup>5</sup> df-HD = fractionated hydrodistillation on dried plant.

## Figures:

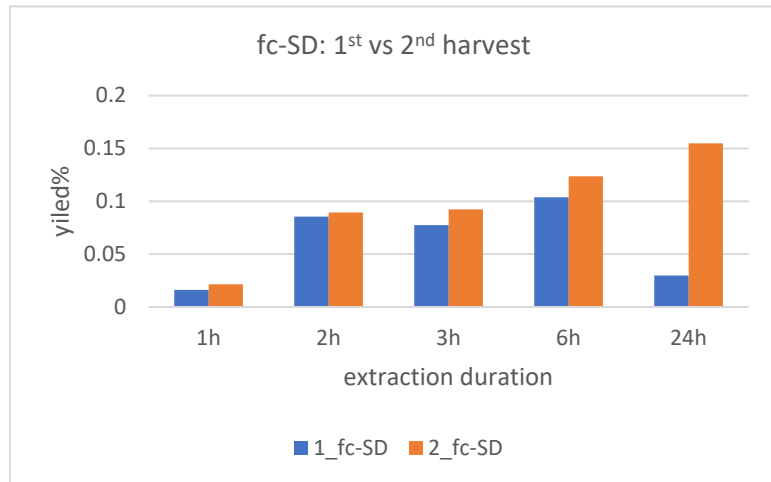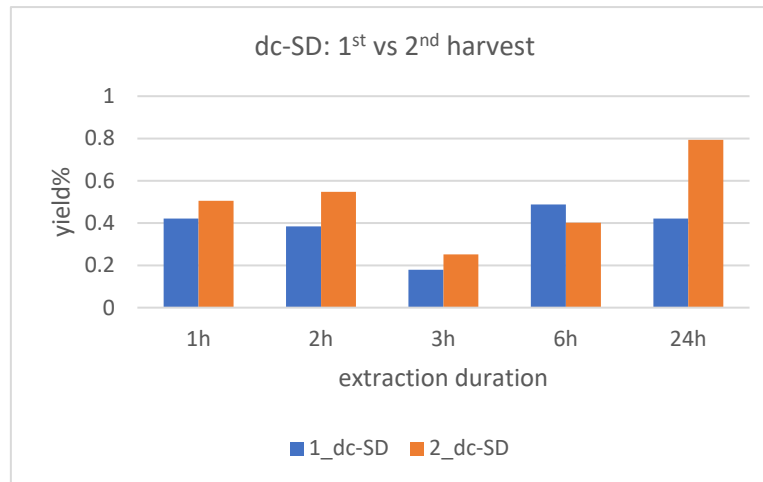

**Figure S1.** Yields% for continued steam distillation: fresh (left) and dried (right) material, comparison between 1<sup>st</sup> and 2<sup>nd</sup> harvest.

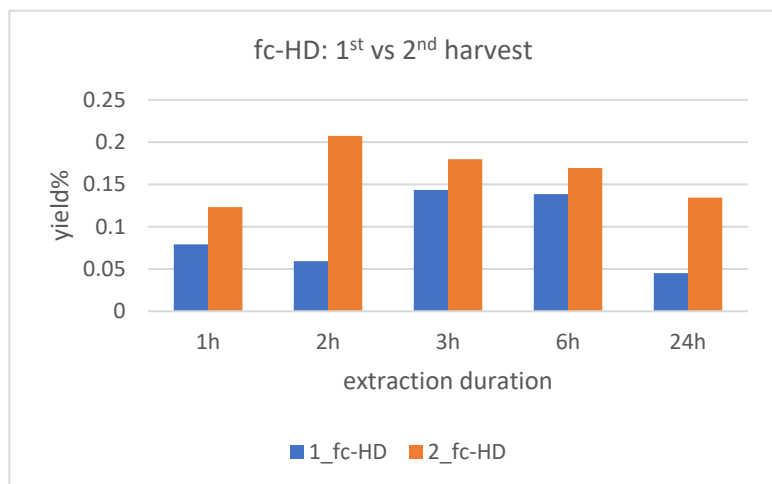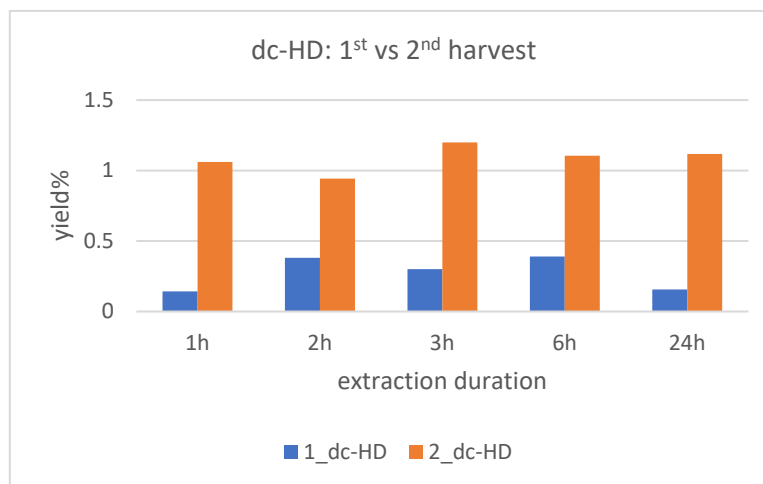

**Figure S2.** Yields% for continued hydrodistillation: fresh (left) and dried (right) material, comparison between 1<sup>st</sup> and 2<sup>nd</sup> harvest.

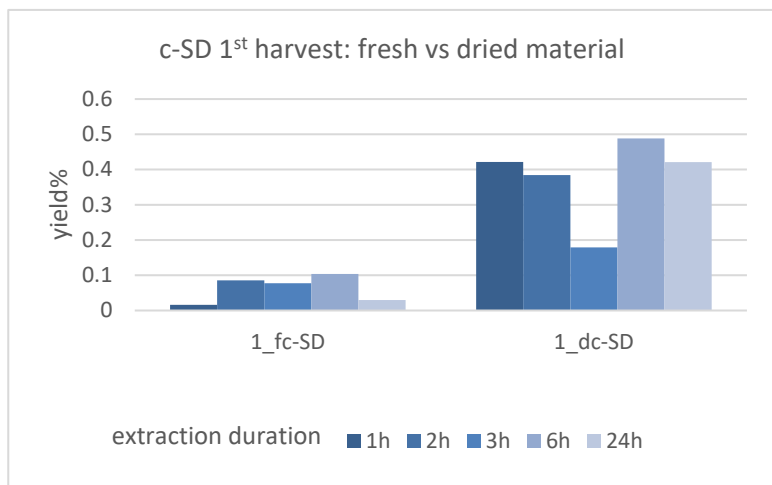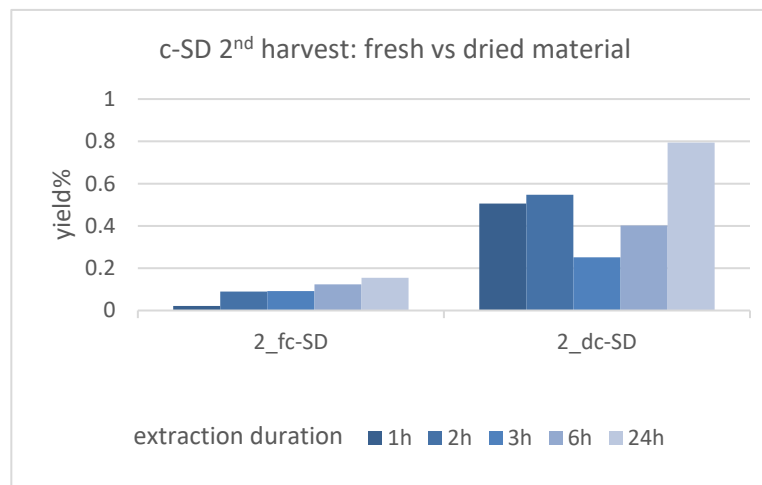

**Figure S3.** Yield comparison of each extraction between fresh and dried materials: continued steam distillation, 1<sup>st</sup> (left) and 2<sup>nd</sup> (right) harvest.

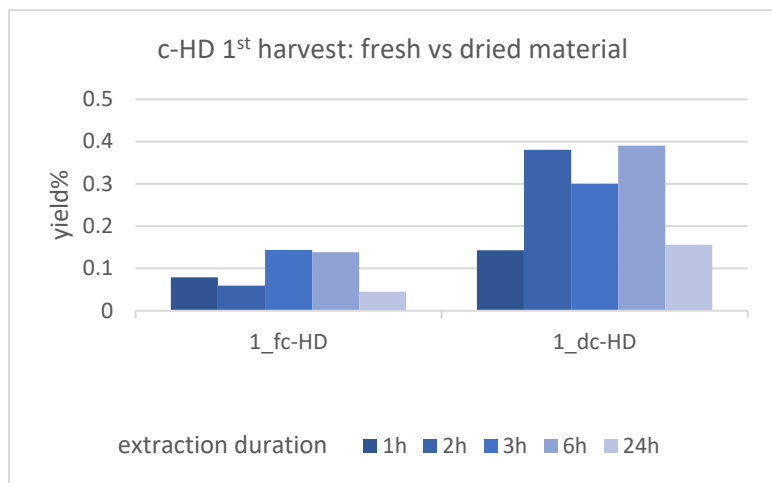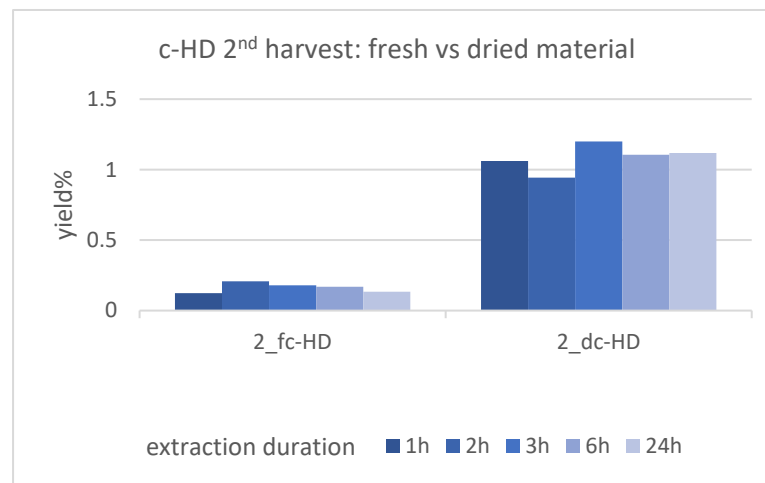

**Figure S4.** Yield comparison of each extraction between fresh and dried materials: continued hydrodistillation, 1<sup>st</sup> (left) and 2<sup>nd</sup> (right) harvest.

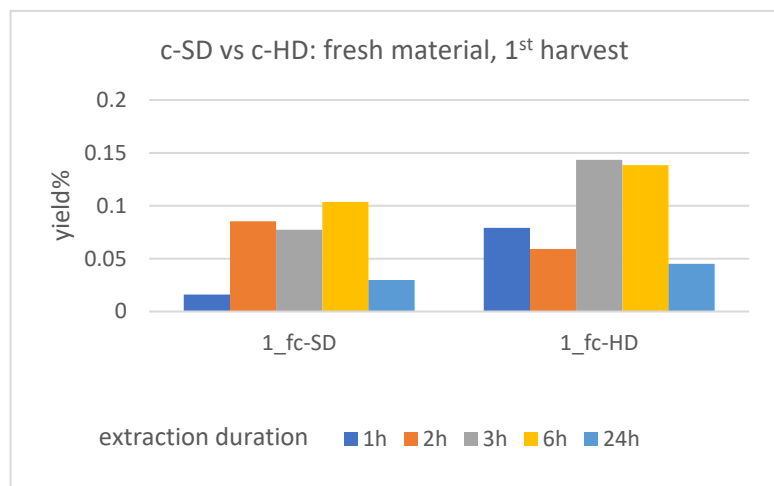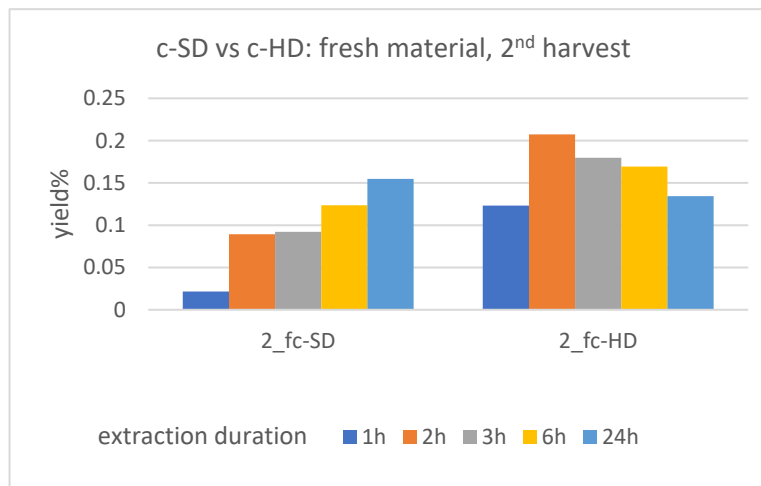

**Figure S5.** Comparison of the yields between continued steam and hydrodistillations: 1<sup>st</sup> (left) and 2<sup>nd</sup> (right) harvest, fresh material.

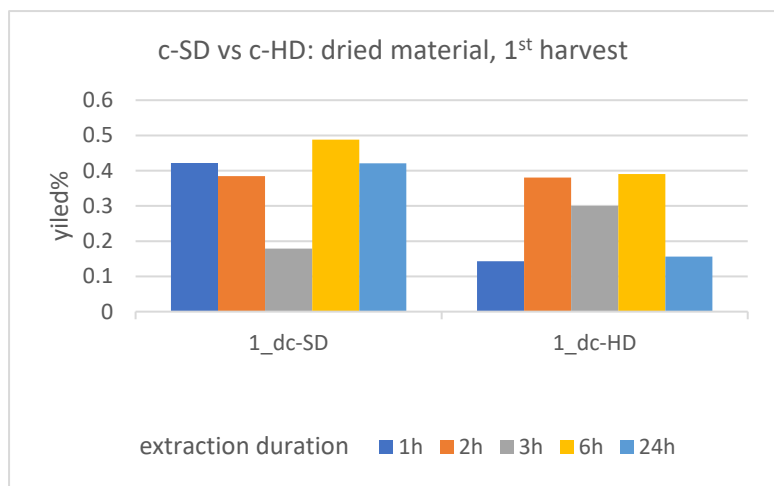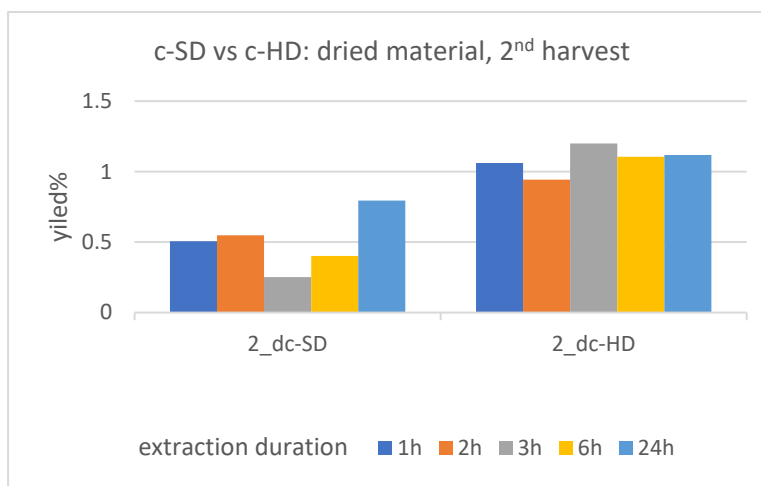

**Figure S6.** Comparison of the yields between continued steam and hydrodistillations: 1<sup>st</sup> (left) and 2<sup>nd</sup> (right) harvest, dried material.

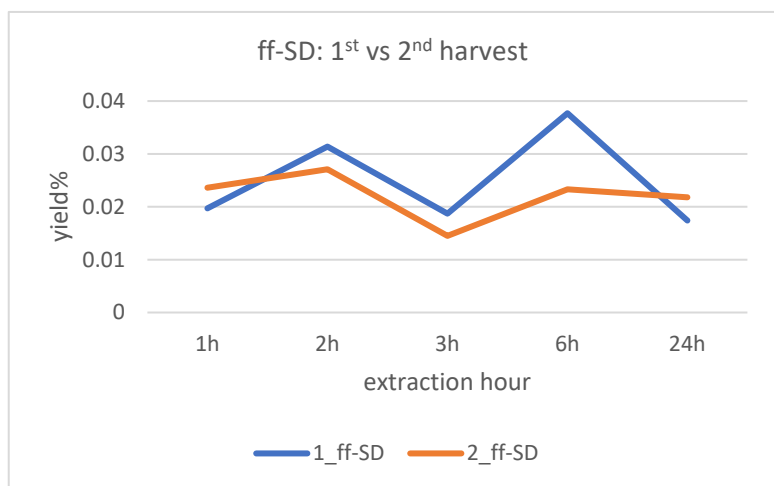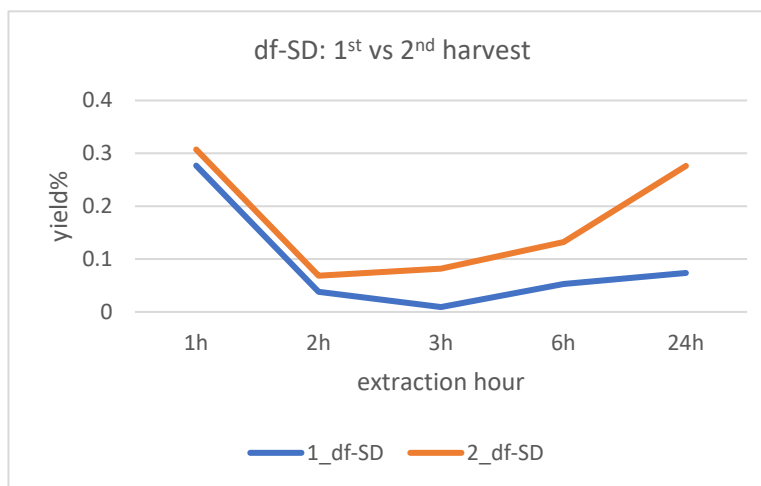

**Figure S7.** Comparison of the yields over the time between 1<sup>st</sup> and 2<sup>nd</sup> harvest: fractionated steam distillation, fresh (left) and dried (right) material.

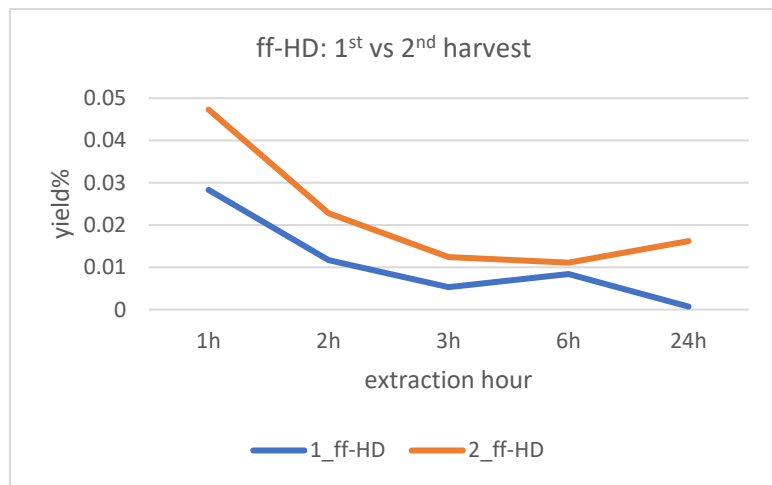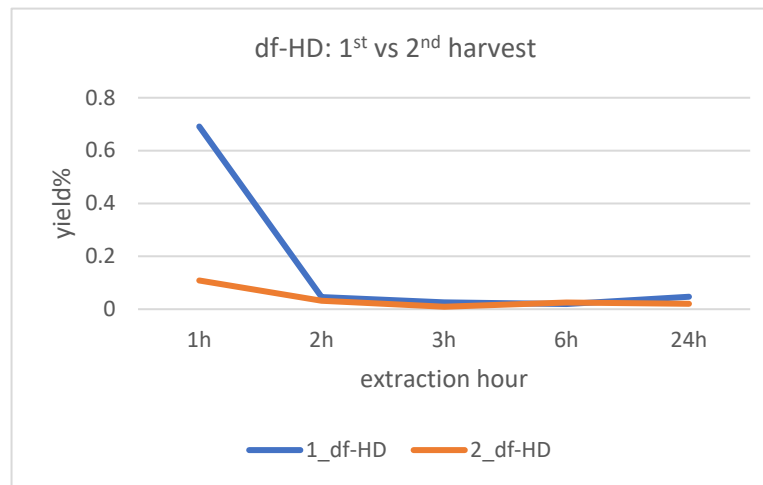

**Figure S8.** Comparison of the yields over the time between 1<sup>st</sup> and 2<sup>nd</sup> harvest: fractionated hydrodistillation, fresh (left) and dried (right) material.

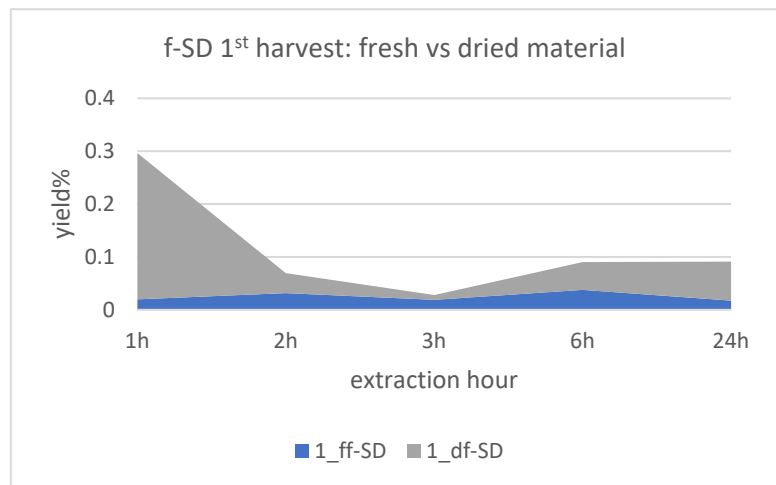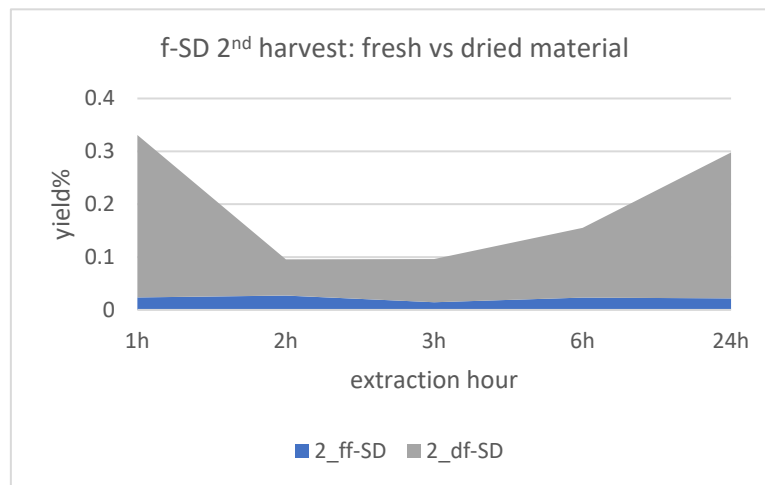

**Figure S9.** Comparison of the yields over the time between fresh and dried materials: fractionated steam distillation, 1<sup>st</sup> (left) and 2<sup>nd</sup> (right) harvest.

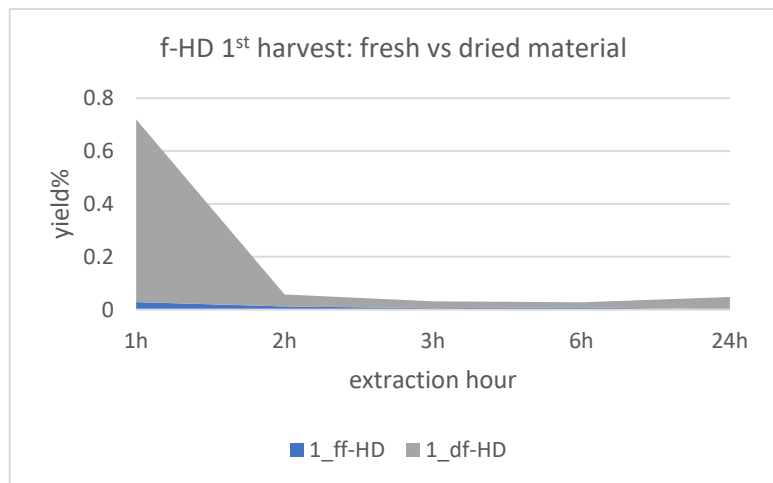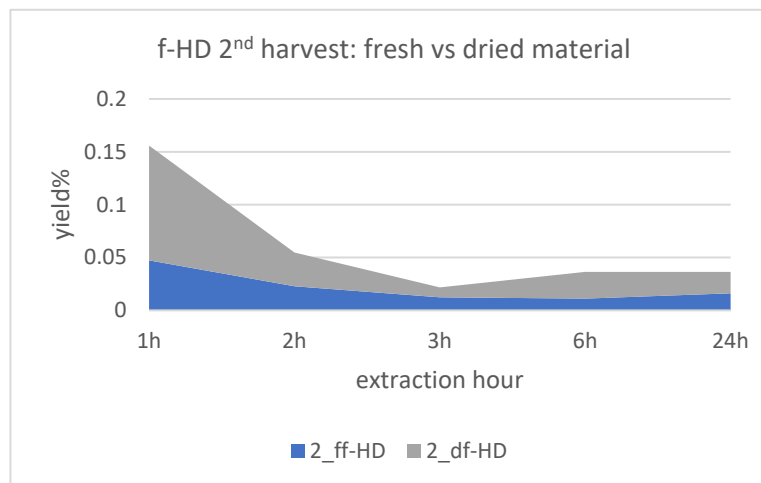

**Figure S10.** Comparison of the yields over the time between fresh and dried materials: fractionated hydrodistillation, 1<sup>st</sup> (left) and 2<sup>nd</sup> (right) harvest.

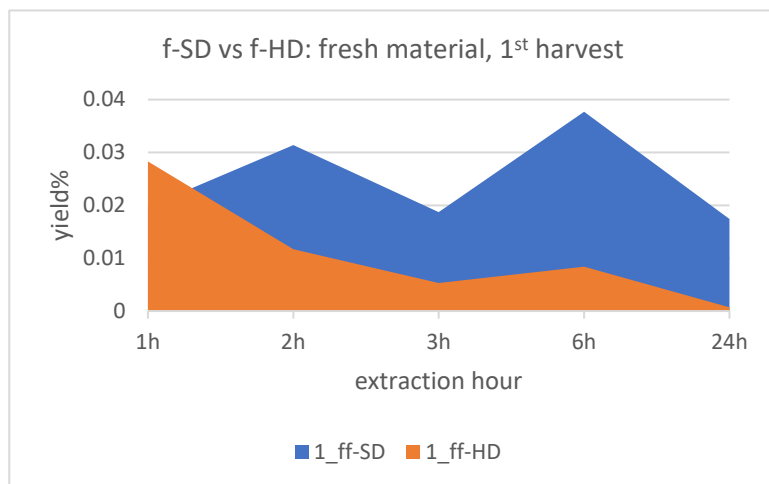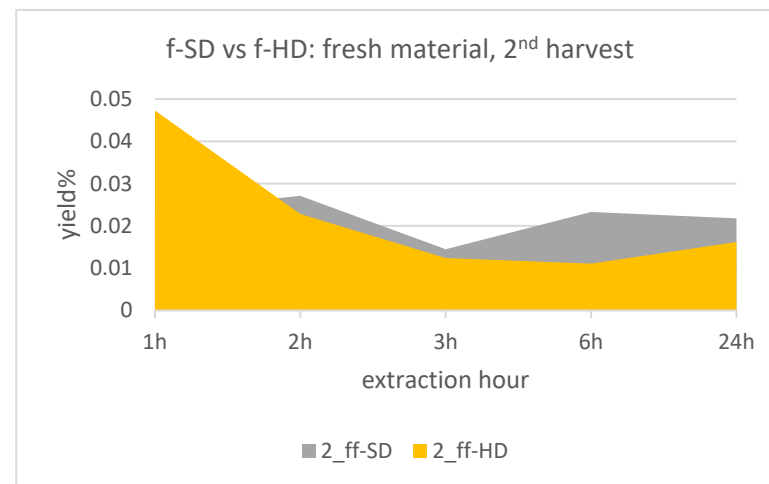

**Figure S11.** Comparison of the yields over the time between fractionated steam and hydrodistillations: 1<sup>st</sup> (left) and 2<sup>nd</sup> (right) harvest, fresh material.

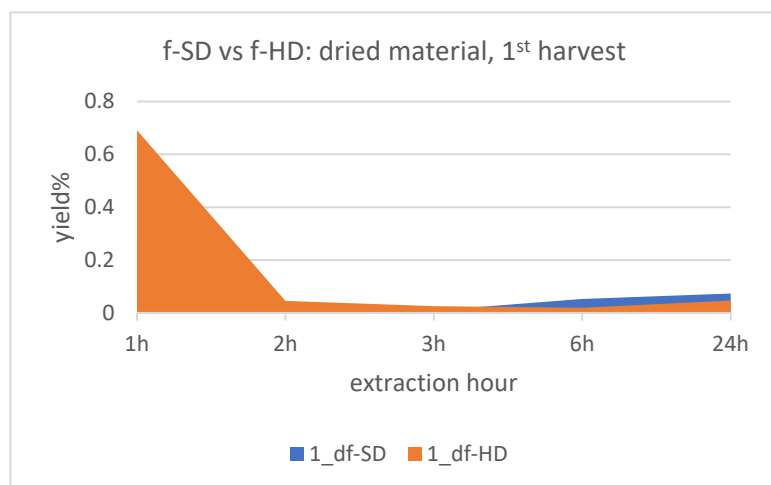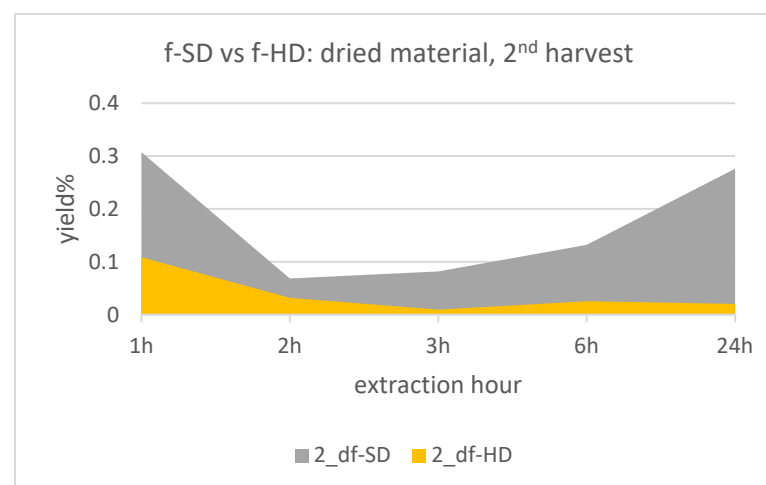

**Figure S12.** Comparison of the yields over the time between fractionated steam and hydrodistillations: 1<sup>st</sup> (left) and 2<sup>nd</sup> (right) harvest, dried material.
